# Supplementary material for: Facile synthesis of NF/ZnOx and NF/CoOx nanostructures for high performance supercapacitor electrode materials
Source: Royal Society of Chemistry journal article supplement (doi:10.1039/c9ra01809c), 2019-01-01
Supplement: c9ra01809c1.pdf [file c9ra01809c1.pdf]

## Supplementary Information

### **Facile synthesis of NF/ZnOx and NF/CoOx nanostructures for high performance supercapacitor electrode materials**

Yedluri Anil Kumar, <sup>a\*</sup> Araveeti Eswar Reddy, <sup>a</sup> Jin-Soo Bak, <sup>a</sup> In-Ho Cho<sup>a</sup> and Hee-Je

Kim<sup>a\*</sup>

<sup>a</sup>School of Electrical Engineering, Pusan National University, Busandaehak-ro 63beon-gil,  
Geumjeong-gu, Busan, 46241, Rep. of KOREA

\*Corresponding Author. Tel: +82 51 510 2364. Fax: +82 51 513 0212.

E-mail: [heeje@pusan.ac.kr](mailto:heeje@pusan.ac.kr) (H.-J. Kim); [yedluri.anil@gmail.com](mailto:yedluri.anil@gmail.com) (Y. A. Kumar)

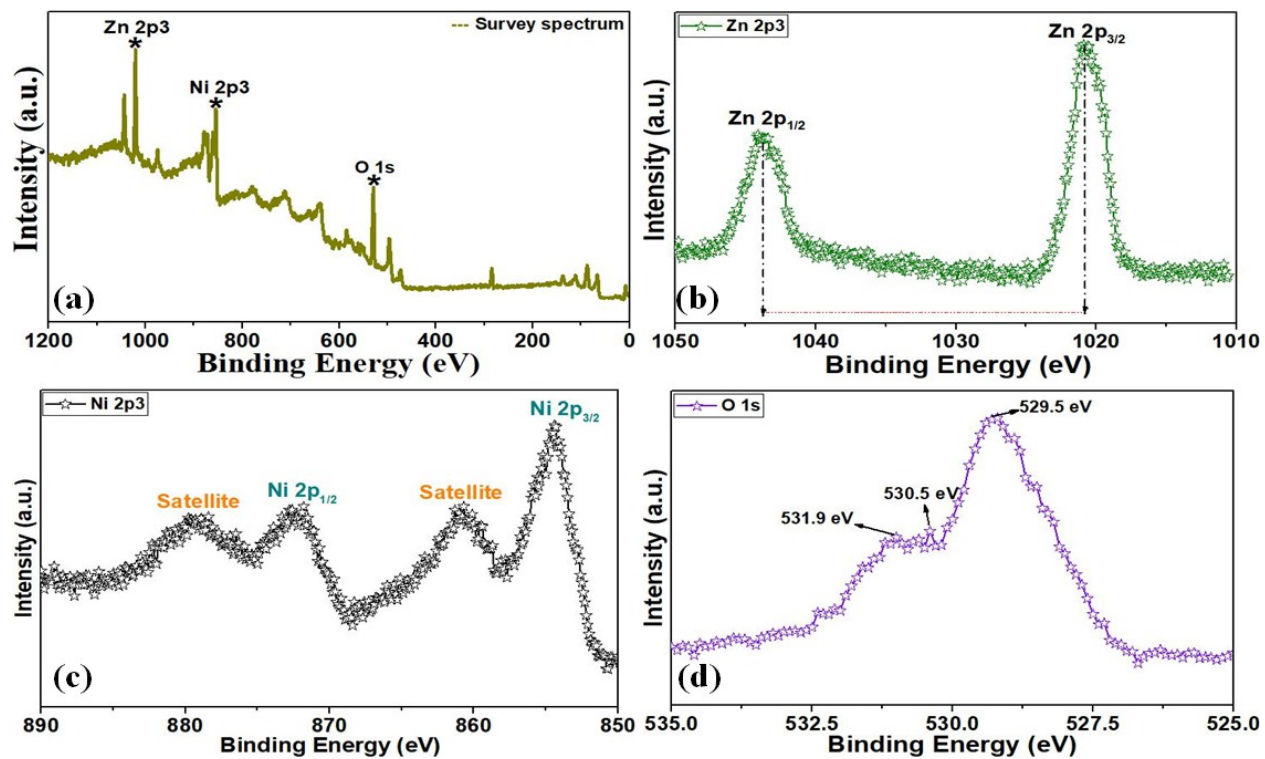

**Fig. S1** X-ray photoelectron spectroscopy (XPS) spectra of the as-synthesized NF/ZnOx (a) survey spectrum, deconvoluted spectra of (b) Zn 2p, (c) Ni 2p and (d) O 1s.

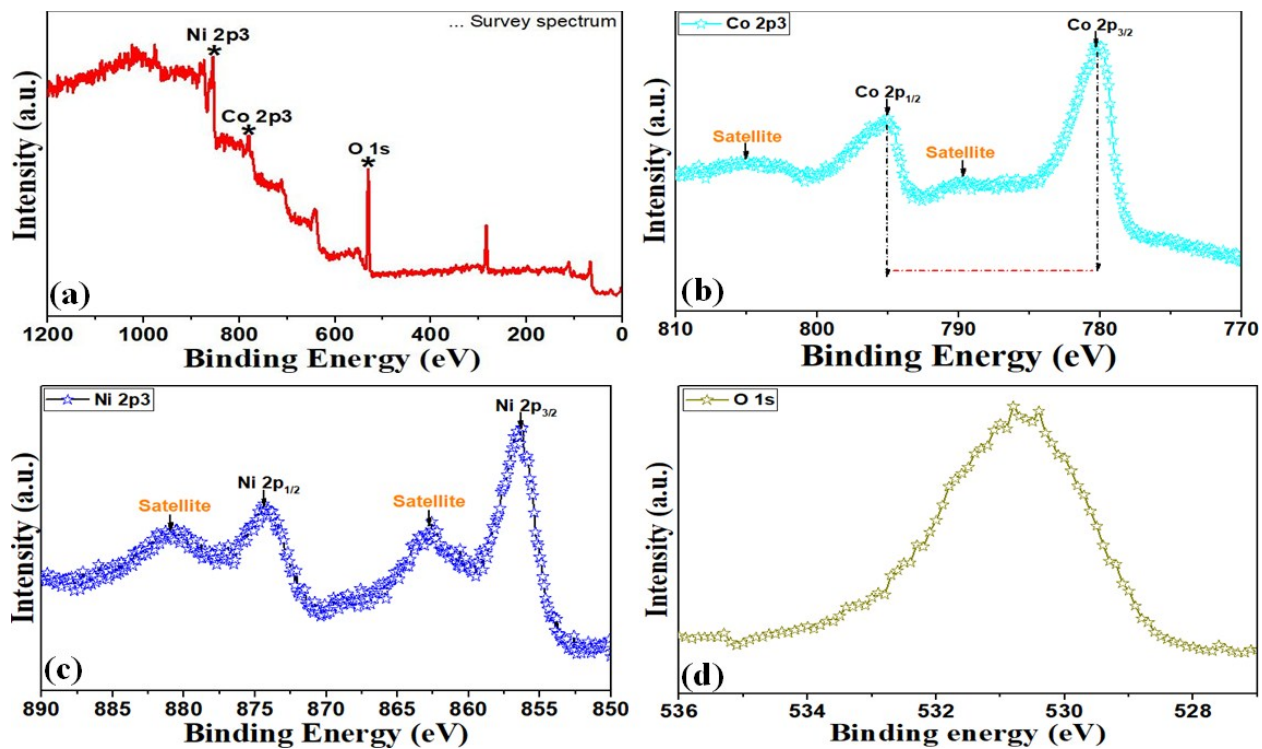

Fig. S2 X-ray photoelectron spectroscopy (XPS) spectra of the as-synthesized NF/CoOx (a) survey spectrum, deconvoluted spectra of (b) Co 2p, (c) Ni 2p and (d) O 1s.

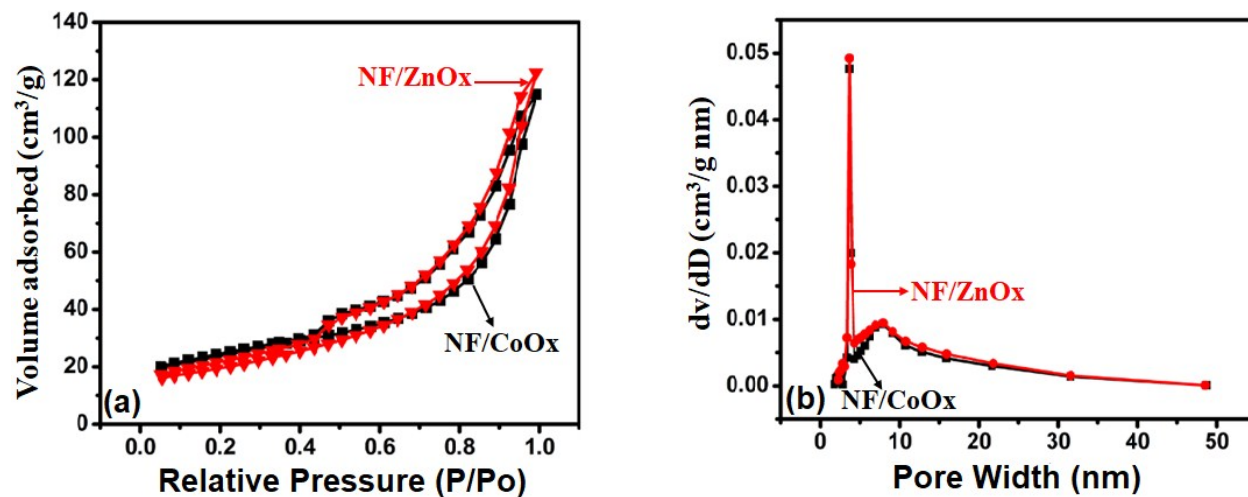

Fig. S3 Specific surface area and  $dV/dD$  pore volume distribution of NF/ZnOx and NF/CoOx.
